# Supplementary material for: Pediatric HIV+ Kaposi sarcoma exhibits clinical, virological, and molecular features different from the adult disease
Source: PubMed Central journal article supplement (PMC10721314; doi:10.1172/jci.insight.167854), 2023-11-22
Supplement: jciinsight-8-167854-s239.pdf [file jciinsight-8-167854-s239.pdf]

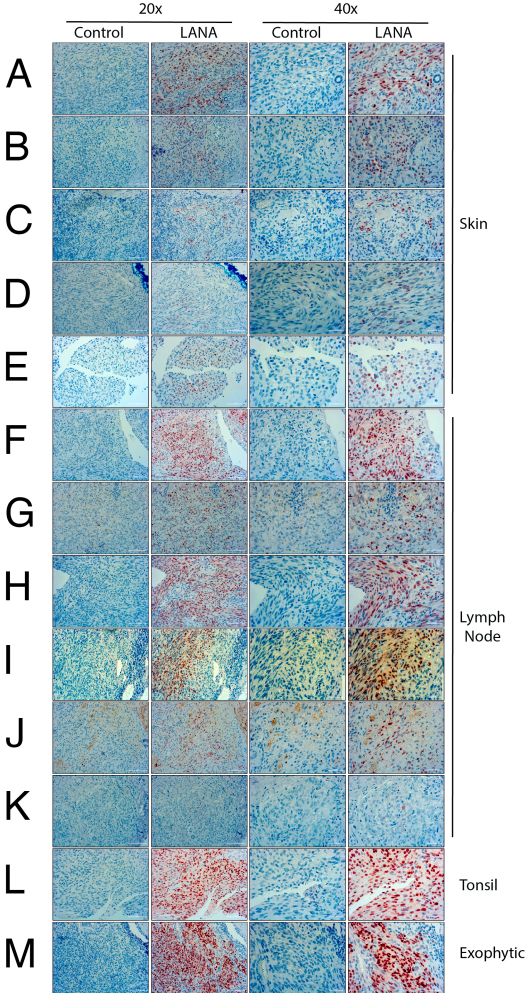

Sup. Figure 1: Representative images of pediatric KS biopsies stained with control or anti-LANA antibody at indicated magnification. Location of the biopsy is on the right.

# Pediatric 2008-2010

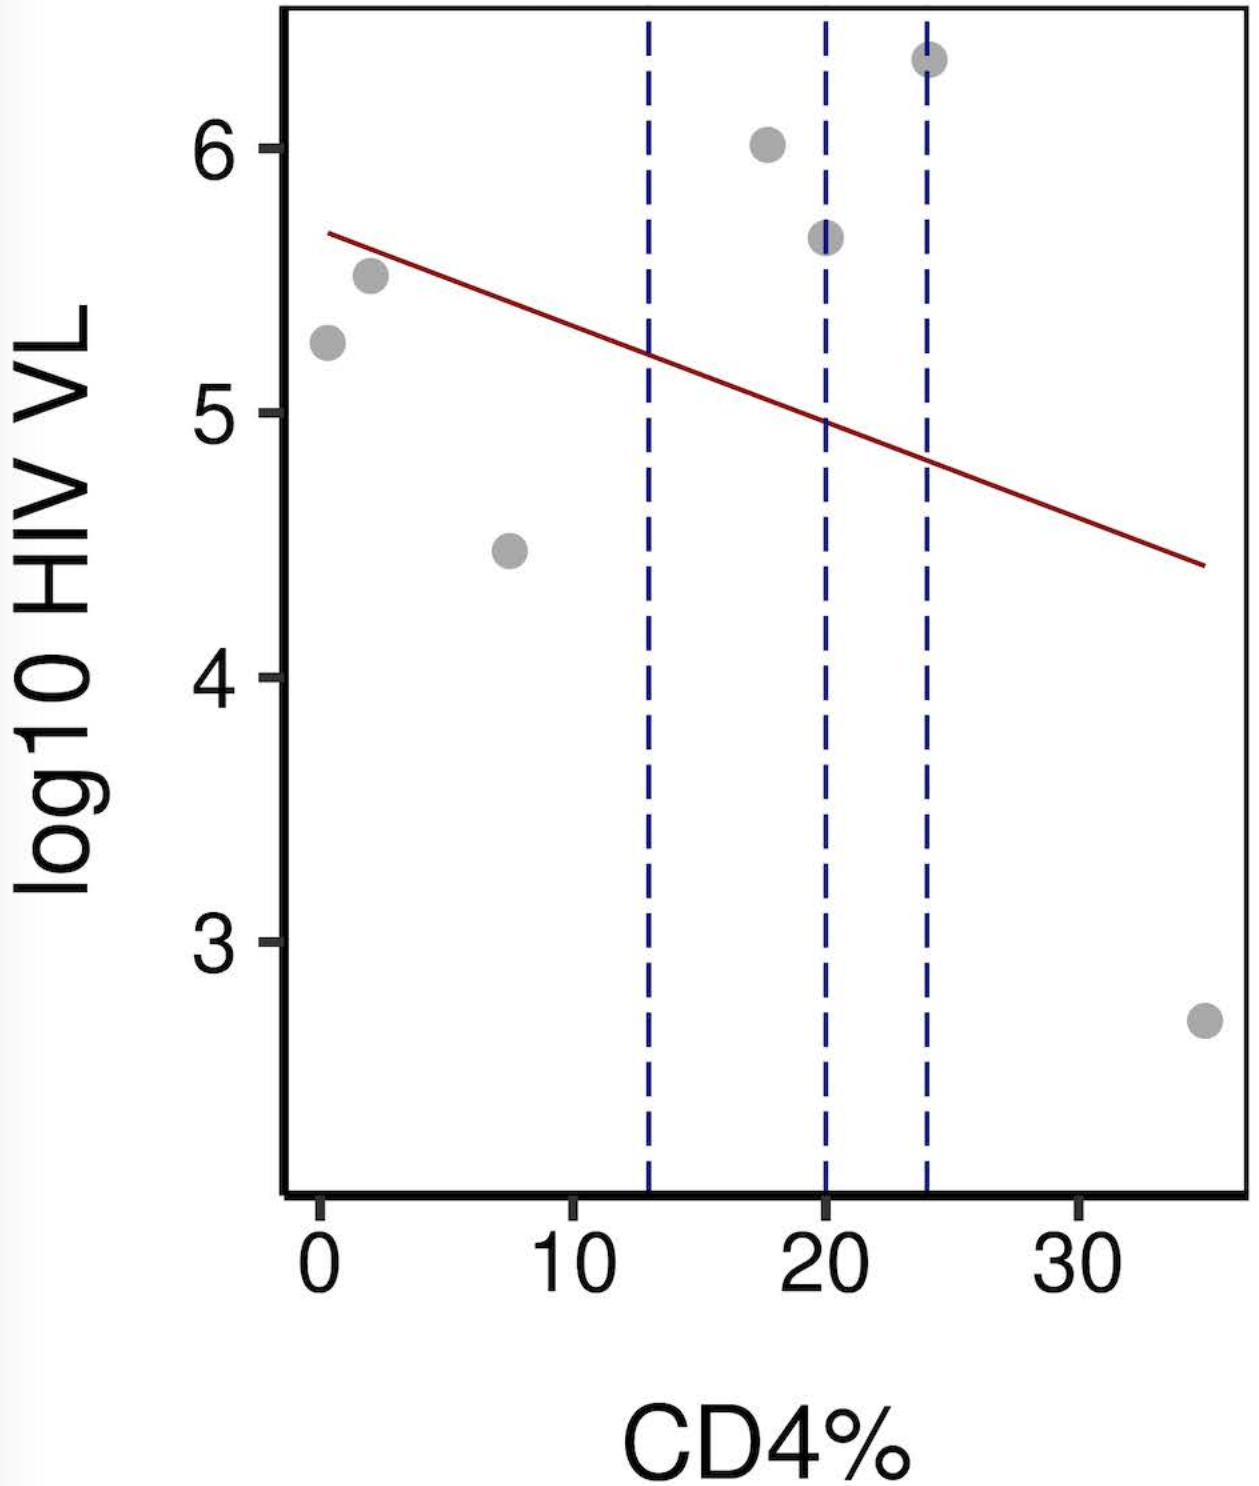

**Sup. Figure 2:** Shown are the log<sub>10</sub> of HIV copy number on the vertical axis and the percent of CD4 cells of PBMC on the horizontal axis. Data are for pediatric participants, where available. The dashed lines indicate cutoff points. The red line indicates the linear regression.

# Pediatric vs. Adult (ref)

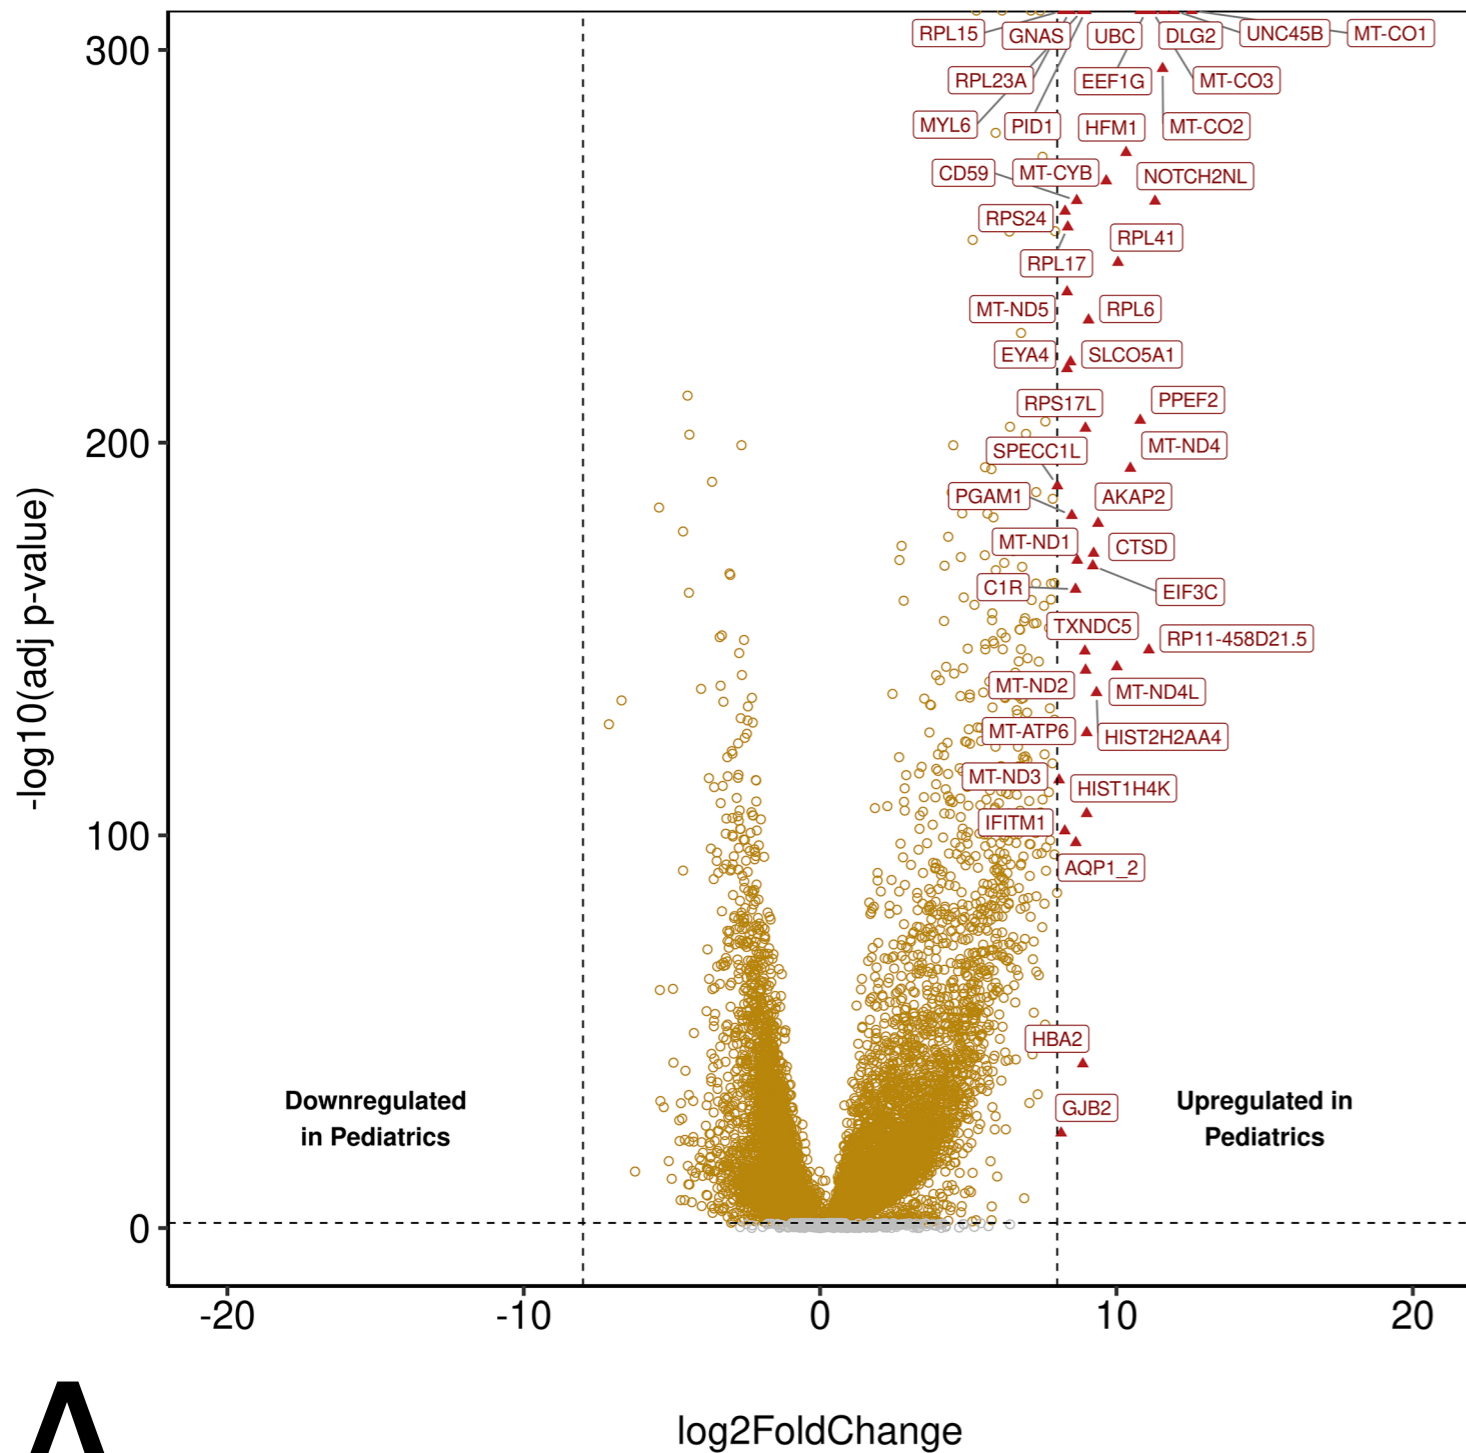

# A

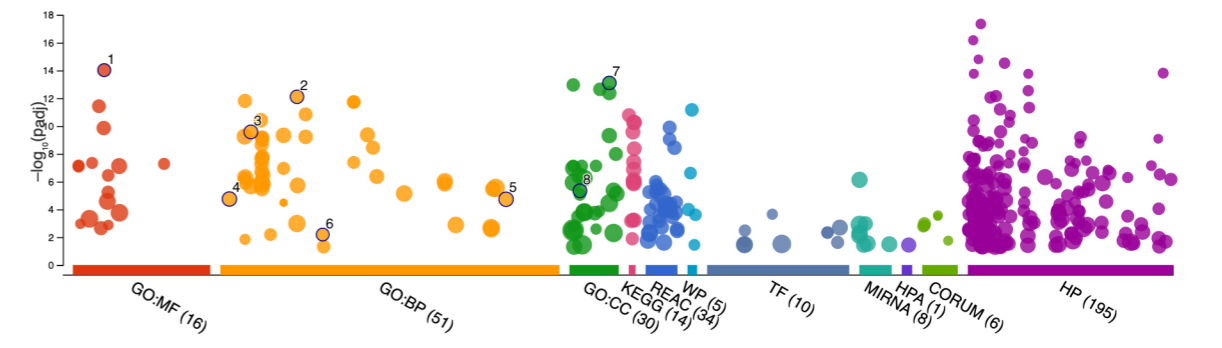

| ID | Source | Term ID    | Term Name                              | padj (query_1)          |
|----|--------|------------|----------------------------------------|-------------------------|
| 1  | GO:MF  | GO:0015453 | oxidoreduction-driven active transm... | 9.456x10 <sup>-15</sup> |
| 2  | GO:BP  | GO:0019646 | aerobic electron transport chain       | 7.873x10 <sup>-13</sup> |
| 3  | GO:BP  | GO:0006754 | ATP biosynthetic process               | 2.647x10 <sup>-10</sup> |
| 4  | GO:BP  | GO:0002181 | cytoplasmic translation                | 1.785x10 <sup>-9</sup>  |
| 5  | GO:BP  | GO:1902600 | proton transmembrane transport         | 1.864x10 <sup>-9</sup>  |
| 6  | GO:BP  | GO:0032981 | mitochondrial respiratory chain com... | 6.466x10 <sup>-3</sup>  |
| 7  | GO:CC  | GO:0098803 | respiratory chain complex              | 7.915x10 <sup>-14</sup> |
| 8  | GO:CC  | GO:0022626 | cytosolic ribosome                     | 4.589x10 <sup>-9</sup>  |

# B

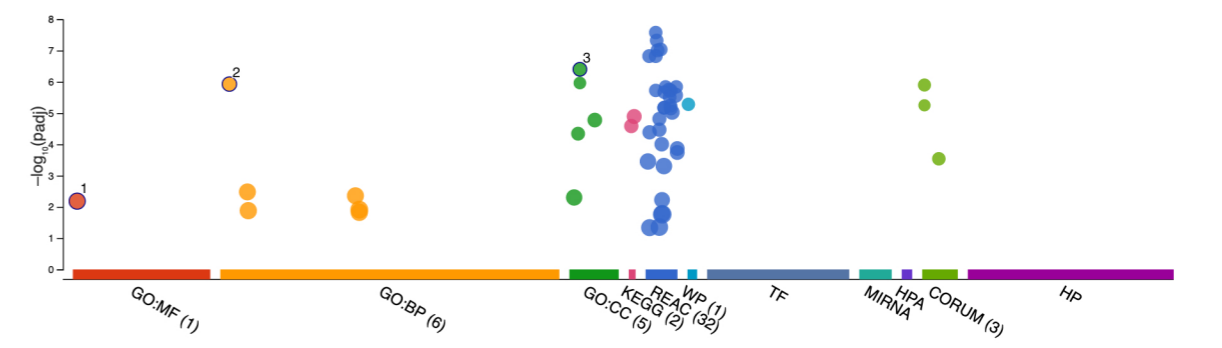

| ID | Source | Term ID    | Term Name                          | padj (query_1)         |
|----|--------|------------|------------------------------------|------------------------|
| 1  | GO:MF  | GO:0003735 | structural constituent of ribosome | 6.563x10 <sup>-3</sup> |
| 2  | GO:BP  | GO:0002181 | cytoplasmic translation            | 1.184x10 <sup>-9</sup> |
| 3  | GO:CC  | GO:0022626 | cytosolic ribosome                 | 3.980x10 <sup>-7</sup> |

# C

Supplemental Figure 3:

(A) Volcano plot displaying differential expressed genes between pediatric and adult KS. The y-axis corresponds to the mean expression value of log 10 (adj p-value), and the x-axis displays the log2 fold change value. The red triangles represent the most significant ( $p < 1 \times 10^{-6}$ ) transcripts with differential expression between pediatric and adults KS. The grey dots represent the non-significant transcripts ( $p > 1 \times 10^{-6}$ ) between pediatric and adults KS. Genes with log2fold change  $> 10$  (1000-fold) are annotated. (B) Pathway analysis of the differentially regulated genes annotated in panel A. The most common GO-terms across multiple data bases are noted below the enrichment graph. (C) Pathway analysis of the differentially regulated genes excluding mitochondrial genes.

group — adult — ped

PCA

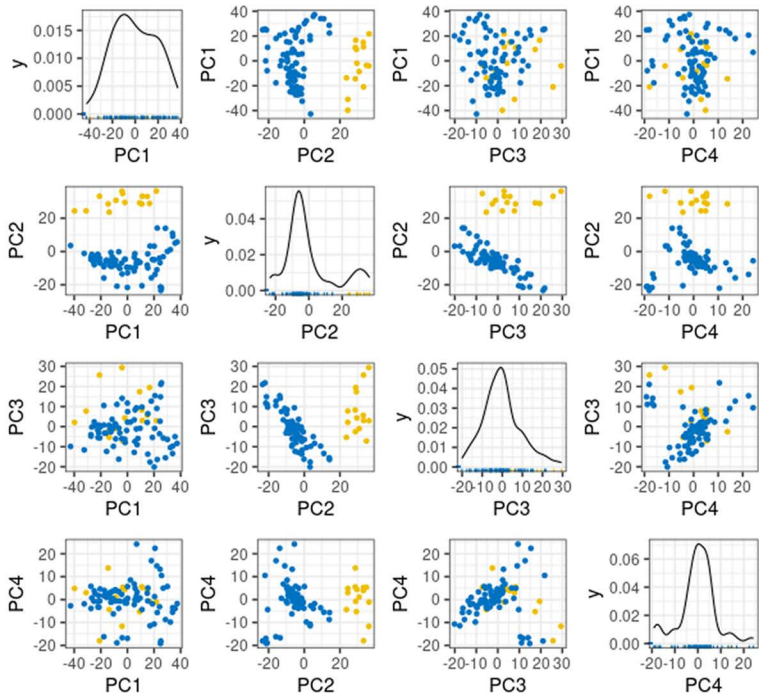

### Supplemental Figure 4:

This is a PCA plot of the first four principal components directions showing that the adult KS. Samples cluster together and away from the pediatric samples.

## Supplemental Table 1

### Clinical characteristics of HIV negative participants

|                                                          |                    |
|----------------------------------------------------------|--------------------|
| <b>Total Participants, n</b>                             | <b>14</b>          |
| Age, median (IQR)                                        | 4.4 (3.4 ~ 9.5)    |
| Gender, M, n (%)                                         | 9 (64.3)           |
| <b>Clinical Characteristics</b>                          |                    |
| Mild Cutaneous/Oral KS, n (%)                            | 0 (0)              |
| Moderate Cutaneous/Oral KS, n (%)                        | 3 (21.4)           |
| Lymphadenopathic KS, n (%)                               | 10 (71.4)          |
| Woody Edema KS, n (%)                                    | 1 (7.1)            |
| Visceral and/or Disseminated<br>Cutaneous/Oral KS, n (%) | 0 (0)              |
| <b>Anatomical Sites of KS involvement</b>                |                    |
| Skin lesions, n (%)                                      | 2 (14.3)           |
| Oral involvement, n (%)                                  | 0 (0)              |
| Lymph node involvement, n (%)                            | 11 (78.6)          |
| Subcutaneous involvement, n (%)                          | 4 (28.6)           |
| Woody involvement, n (%)                                 | 1 (7.1)            |
| Pulmonary involvement, n (%)                             | 0 (0)              |
| Gastrointestinal involvement, n (%)                      | 0 (0)              |
| Lesions in other areas than ones listed,<br>n (%)        | 4 (50)             |
| Lesions only in lymph nodes, n (%)                       | 9 (64.3)           |
| <b>Baseline Lab Results</b>                              |                    |
| CD4 count, median (IQR)                                  | 2062 (1575 ~ 2548) |
| Hemoglobin, mean (SD)                                    | 8.6 (2.9)          |
| Platelet count, median (IQR)                             | 215.5 (24 ~ 330)   |
| Neutrophil count, median (IQR)                           | 2543 (1882 ~ 4029) |
| White blood cell count, median (IQR)                     | 7.5 (7.1 ~ 10.6)   |

## Supplemental Table 2

### Clinical characteristics of HIV positive participants.

#### **Total Participants, n 56**

|                   |                  |
|-------------------|------------------|
| Age, median (IQR) | 7.1 (4.4 ~ 10.7) |
| Gender, M, n (%)  | 33 (58.9)        |

#### **Clinical Characteristics**

|                                                          |           |
|----------------------------------------------------------|-----------|
| Mild Cutaneous/Oral KS, n (%)                            | 1 (1.8)   |
| Moderate Cutaneous/Oral KS, n (%)                        | 5 (8.9)   |
| Lymphadenopathic KS, n (%)                               | 27 (48.2) |
| Woody Edema KS, n (%)                                    | 10 (17.9) |
| Visceral and/or Disseminated<br>Cutaneous/Oral KS, n (%) | 13 (23.2) |

#### **Anatomical Sites of KS involvement**

|                                                   |           |
|---------------------------------------------------|-----------|
| Skin lesions, n (%)                               | 27 (48.2) |
| Oral involvement, n (%)                           | 20 (35.7) |
| Lymph node involvement, n (%)                     | 39 (69.6) |
| Subcutaneous involvement, n (%)                   | 14 (25)   |
| Woody involvement, n (%)                          | 11 (19.6) |
| Pulmonary involvement, n (%)                      | 7 (15.6)  |
| Gastrointestinal involvement, n (%)               | 0 (0)     |
| Lesions in other areas than ones listed,<br>n (%) | 4 (10.5)  |
| Lesions only in lymph nodes, n (%)                | 16 (28.6) |

#### **HIV Characteristics**

|                                            |                 |
|--------------------------------------------|-----------------|
| Adult KS classification, n (%)             | 19 (33.9)       |
| HIV viral load log copies/mL, median (IQR) | 4.7 (2.2 ~ 5.4) |
| Status of HIV treatment                    | 23 (41.1)       |
| Months on HIV treatment, median (IQR)      | 14 (4.5 ~ 43.5) |
| CD4 count, median (IQR)                    | 398 (143 ~ 868) |

#### **Baseline Lab Results**

#### **Total Participants, n 56**

|                                      |                       |
|--------------------------------------|-----------------------|
| Hemoglobin, mean (SD)                | 8.9 (2.3)             |
| Platelet count, median (IQR)         | 219 (111 ~ 347)       |
| Neutrophil count, median (IQR)       | 1,971 (1,334 ~ 3,258) |
| White blood cell count, median (IQR) | 7.3 (4.5 ~ 9.4)       |

**Supplemental Table 3**

QC data for KSHV targeted sequencing analysis of KSHV genomes.

| Samples   | Total reads | Mapped Reads | 10x Coverage | 50x Coverage | SNVs# | Site      | GenBank ID |
|-----------|-------------|--------------|--------------|--------------|-------|-----------|------------|
| PEDKS16   | 6,383,680   | 4,789,482    | 86%          | 75%          | 170   | LN        |            |
| PEDKS17   | 17,555,865  | 16,291,744   | 94%          | 89%          | 129   | LN        |            |
| PEDKS18   | 14,756,528  | 10,879,447   | 81%          | 71%          | 162   | Cutaneous |            |
| PEDKS19   | 12,963,395  | 9,602,310    | 68%          | 59%          | 158   | Cutaneous |            |
| PEDKS02   | 9,854,381   | 9,715,313    | 91%          | 86%          | 167   | Exophytic |            |
| PEDKS10   | 2,959,355   | 2,839,947    | 87%          | 81%          | 165   | LN        |            |
| PEDKS21-1 | 14,995,909  | 14,876,729   | 95%          | 90%          | 150   | Tonsil    |            |
| PEDKS21-2 | 16,269,326  | 16,212,125   | 95%          | 91%          | 160   | Tonsil    |            |
| PEDKS21-3 | 9,273,912   | 9,218,664    | 94%          | 88%          | 155   | Tonsil    |            |
| PEDKS22   | 5,688,369   | 5,585,763    | 92%          | 85%          | 180   | LN        |            |
| PEDKS23   | 12,188,876  | 11,947,988   | 80%          | 77%          | 169   | Edema     |            |
| Median    | 12,188,876  | 9,715,313    | 90%          | 5%           | 162   |           |            |
| St Dev    | 4,735,349   | 4,526,909    | 8%           | 10%          | 13    |           |            |

(#) non-synonymous SNV

**Supplemental Table 4**

List of differentially regulated genes between adult and pediatric KS

| <b>Gene</b>   | <b>Mean</b> | <b>log2<br/>FoldChange</b> | <b>lfcSE</b> | <b>pvalue</b> | <b>padj</b> | <b>abs_log2<br/>FoldChange</b> |
|---------------|-------------|----------------------------|--------------|---------------|-------------|--------------------------------|
| DLG2          | 26,106.20   | 11.60                      | 0.29         | 0             | 0           | 11.60                          |
| EEF1G         | 491.94      | 11.01                      | 0.28         | 0             | 0           | 11.01                          |
| GNAS          | 237.85      | 8.30                       | 0.22         | 0             | 0           | 8.30                           |
| MT-CO1        | 3,122.12    | 12.54                      | 0.24         | 0             | 0           | 12.54                          |
| MT-CO3        | 966.43      | 11.19                      | 0.27         | 0             | 0           | 11.19                          |
| MYL6          | 222.82      | 8.85                       | 0.23         | 0             | 0           | 8.85                           |
| PID1          | 4,528.65    | 8.96                       | 0.23         | 0             | 0           | 8.96                           |
| RPL15         | 327.42      | 8.20                       | 0.19         | 0             | 0           | 8.20                           |
| RPL23A        | 210.67      | 8.44                       | 0.22         | 0             | 0           | 8.44                           |
| UBC           | 550.28      | 10.81                      | 0.27         | 0             | 0           | 10.81                          |
| UNC45B        | 29,975.69   | 11.95                      | 0.30         | 0             | 0           | 11.95                          |
| MT-CO2        | 997.86      | 11.56                      | 0.32         | 5.44E-299     | 5.45E-296   | 11.56                          |
| HFM1          | 43,305.96   | 10.32                      | 0.29         | 1.60E-277     | 1.35E-274   | 10.32                          |
| MT-CYB        | 439.19      | 9.65                       | 0.28         | 2.82E-270     | 2.15E-267   | 9.65                           |
| CD59          | 210.98      | 8.66                       | 0.25         | 3.10E-265     | 2.26E-262   | 8.66                           |
| NOTCH2NL      | 10,421.53   | 11.30                      | 0.33         | 4.72E-265     | 3.29E-262   | 11.30                          |
| RPS24         | 230.70      | 8.27                       | 0.24         | 1.82E-262     | 1.21E-259   | 8.27                           |
| RPL17         | 144.38      | 8.36                       | 0.25         | 1.87E-258     | 1.20E-255   | 8.36                           |
| RPL41         | 386.25      | 10.05                      | 0.30         | 2.30E-249     | 1.27E-246   | 10.05                          |
| MT-ND5        | 357.17      | 8.34                       | 0.25         | 7.64E-242     | 4.08E-239   | 8.34                           |
| RPL6          | 277.95      | 9.06                       | 0.28         | 1.23E-234     | 5.96E-232   | 9.06                           |
| SLCO5A1       | 8,632.37    | 8.45                       | 0.27         | 6.17E-224     | 2.75E-221   | 8.45                           |
| EYA4          | 1,867.44    | 8.33                       | 0.26         | 3.23E-222     | 1.40E-219   | 8.33                           |
| PPEF2         | 2,194.04    | 10.80                      | 0.35         | 5.29E-209     | 2.12E-206   | 10.80                          |
| RPS17L        | 115.67      | 8.95                       | 0.29         | 5.45E-207     | 2.03E-204   | 8.95                           |
| MT-ND4        | 768.93      | 10.47                      | 0.35         | 1.09E-196     | 3.44E-194   | 10.47                          |
| SPECC1L       | 59.81       | 8.01                       | 0.27         | 3.41E-192     | 1.01E-189   | 8.01                           |
| PGAM1         | 135.35      | 8.49                       | 0.30         | 1.33E-184     | 3.44E-182   | 8.49                           |
| AKAP2         | 158.32      | 9.38                       | 0.33         | 1.37E-182     | 3.44E-180   | 9.38                           |
| CTSD          | 193.62      | 9.23                       | 0.33         | 6.52E-175     | 1.49E-172   | 9.23                           |
| MT-ND1        | 190.73      | 8.68                       | 0.31         | 4.25E-173     | 9.21E-171   | 8.68                           |
| EIF3C         | 144.50      | 9.20                       | 0.33         | 1.10E-171     | 2.30E-169   | 9.20                           |
| C1R           | 125.85      | 8.62                       | 0.32         | 1.19E-165     | 2.19E-163   | 8.62                           |
| RP11-458D21.5 | 2,337.79    | 11.09                      | 0.43         | 4.46E-150     | 6.06E-148   | 11.09                          |
| TXNDC5        | 120.98      | 8.94                       | 0.35         | 8.84E-150     | 1.19E-147   | 8.94                           |
| MT-ND4L       | 273.82      | 10.01                      | 0.39         | 9.12E-146     | 1.18E-143   | 10.01                          |
| MT-ND2        | 208.02      | 8.96                       | 0.35         | 6.90E-145     | 8.71E-143   | 8.96                           |
| HIST2H2AA4    | 155.52      | 9.33                       | 0.38         | 3.81E-139     | 4.40E-137   | 9.33                           |
| MT-ATP6       | 228.58      | 9.00                       | 0.37         | 7.60E-129     | 7.04E-127   | 9.00                           |
| MT-ND3        | 72.22       | 8.06                       | 0.35         | 1.06E-116     | 7.91E-115   | 8.06                           |
| HIST1H4K      | 125.49      | 8.99                       | 0.41         | 4.61E-108     | 2.80E-106   | 8.99                           |
| IFITM1        | 79.75       | 8.26                       | 0.39         | 1.36E-103     | 7.58E-102   | 8.26                           |
| AQP1_2        | 128.99      | 8.63                       | 0.41         | 1.39E-100     | 7.18E-99    | 8.63                           |



**Supplemental Table 5**Clinical characteristics of adult KS samples used for RNAseq.

|                                                               |                   |
|---------------------------------------------------------------|-------------------|
| Number of participants (n)                                    | 78                |
| Age, years, median (IQR)                                      | 36.9 (32 ~ 42)    |
| Gender; men, n (%)                                            | 62 (79.5)         |
| <b>Staging</b>                                                |                   |
| Tumor severity T0 (ACTG), n (%)                               | 12 (15.4)         |
| On ART <3 months prior to KS treatment                        | 5 (41.7)          |
| Karnofsky performance status ≤70%, n (%)                      | 31 (39.7)         |
| Illness severity S1, n (%)                                    | 46 (59)           |
| <b>Symptoms</b>                                               |                   |
| Oedema present, n (%)                                         | 39 (50.6)         |
| Visceral disease present, n (%)                               | 6 (7.8)           |
| Oral involvement present, n (%)                               | 29 (37.7)         |
| <b>HIV Characteristics</b>                                    |                   |
| HIV diagnosis prior to KS diagnosis, n (%)                    | 43 (55.1)         |
| Months HIV+ diagnosis known, median (IQR)                     | 15.7 (6.3 ~ 64.3) |
| On ART prior to KS diagnosis, n (%)                           | 37 (47.4)         |
| Months on ART prior to diagnosis, median (IQR)                | 15.7 (6.4 ~ 65.8) |
| CD4 count, median (IQR)                                       | 197 (103 ~ 337)   |
| HIV viral load log copies/mL, median (IQR)                    | 2.6 (1.6 ~ 4.8)   |
| HIV viral load < 1000 copies/mL, n (%)                        | 46 (61.3)         |
| <b>Baseline Lab Results</b>                                   |                   |
| Hemoglobin, g/dL, mean (SD)                                   | 11.3 (2.7)        |
| Platelets, 10 <sup>3</sup> /μL, median (IQR)                  | 230 (145 ~ 273)   |
| White blood cell, x10 <sup>3</sup> /μL, median (IQR)          | 4.7 (3.8 ~ 5.8)   |
| Absolute neutrophil count, x10 <sup>3</sup> /μL, median (IQR) | 2.2 (1.5 ~ 2.8)   |
| Creatinine, mg/dL/ median (IQR)                               | 0.8 (0.7 ~ 0.9)   |
| Bilirubin, total, mg/dL, median (IQR)                         | 0.4 (0.3 ~ 0.5)   |
